# Supplementary material for: An improved method for atmospheric 14 CO measurements
Source: Copernicus journal article supplement (doi:10.5194/amt-2020-328), 2020-09-11
Supplement: Supplementary file 1 [file amt-2020-328-supplement.pdf]

| <b>Sample number</b> | <b>First sampling date, mo/day/yr</b> | <b>Second sampling date, mo/day/yr</b> | <b>Sample mass, <math>\mu\text{g C}</math></b> | <b><math>^{14}\text{CO}</math>, molecules / cc STP</b> | <b>Error</b> |
|----------------------|---------------------------------------|----------------------------------------|------------------------------------------------|--------------------------------------------------------|--------------|
| Sample 1             | 11/14/17                              | 11/21/17                               | 21.8                                           | 9.83                                                   | 0.25         |
| Sample 2             | 11/28/17                              | 12/4/17                                | 22.6                                           | 11.48                                                  | 0.36         |
| Sample 3             | 11/28/17                              | 12/5/17                                | 22.0                                           | 11.08                                                  | 0.34         |
| Sample 4             | 12/12/17                              | 12/19/17                               | 21.6                                           | 7.52                                                   | 0.21         |
| Sample 5             | 12/26/17                              | 1/2/18                                 | 21.6                                           | 8.60                                                   | 0.30         |
| Sample 6             | 12/26/17                              | 1/2/18                                 | 21.8                                           | 8.39                                                   | 0.30         |
| Sample 7             | 1/11/18                               | 1/18/18                                | 22.2                                           | 10.44                                                  | 0.27         |
| Sample 8             | 1/25/18                               | 2/1/18                                 | 22.1                                           | 8.45                                                   | 0.31         |
| Sample 9             | 1/25/18                               | 2/1/18                                 | 21.7                                           | 8.39                                                   | 0.32         |
| Sample 10            | 2/8/18                                | 2/15/18                                | 23.1                                           | 12.94                                                  | 0.38         |
| Sample 11            | 2/8/18                                | 2/15/18                                | 21.8                                           | 13.04                                                  | 0.38         |
| Sample 12            | 2/22/18                               | 3/1/18                                 | 22.1                                           | 9.51                                                   | 0.25         |
| Sample 14            | 3/6/18                                | 3/15/18                                | 21.4                                           | 9.76                                                   | 0.32         |
| Sample 16            | 4/5/18                                | 4/12/18                                | 21.9                                           | 6.74                                                   | 0.18         |
| Sample 17            | 4/17/18                               | 4/26/18                                | 22.4                                           | 9.92                                                   | 0.32         |
| Sample 18            | 4/17/18                               | 4/26/18                                | 21.4                                           | 9.68                                                   | 0.32         |
| Sample 19            | 5/3/18                                | 5/8/18                                 | 21.9                                           | 8.66                                                   | 0.23         |
| Sample 20            | 5/18/18                               | 5/24/18                                | 21.7                                           | 8.25                                                   | 0.30         |
| Sample 21            | 5/18/18                               | 5/24/18                                | 21.4                                           | 8.72                                                   | 0.31         |
| Sample 22            | 5/31/18                               | 6/7/18                                 | 22.1                                           | 9.81                                                   | 0.26         |
| Sample 23            | 6/19/18                               | N/A                                    | 21.5                                           | 5.44                                                   | 0.16         |
| Sample 24            | 6/26/18                               | 7/3/18                                 | 20.9                                           | 6.99                                                   | 0.29         |
| Sample 25            | 6/26/18                               | 7/3/18                                 | 20.8                                           | 6.77                                                   | 0.28         |
| Sample 26            | 7/12/18                               | 7/17/18                                | 21.2                                           | 5.92                                                   | 0.27         |
| Sample 27            | 7/12/18                               | 7/17/18                                | 20.6                                           | 6.21                                                   | 0.28         |
| Sample 28            | 8/2/18                                | N/A                                    | 50.4                                           | 4.99                                                   | 0.12         |
| Sample 29            | 8/14/18                               | N/A                                    | 50.6                                           | 6.11                                                   | 0.32         |
| Sample 30            | 8/14/18                               | N/A                                    | 50.4                                           | 6.41                                                   | 0.31         |
| Sample 31            | 8/21/18                               | 8/28/18                                | 49.3                                           | 5.75                                                   | 0.12         |
| Sample 32            | 9/4/18                                | 9/11/18                                | 48.3                                           | 6.35                                                   | 0.24         |
| Sample 33            | 9/4/18                                | 9/11/18                                | 49.7                                           | 6.55                                                   | 0.24         |
| Sample 35            | 10/4/18                               | 10/11/18                               | 52.0                                           | 6.89                                                   | 0.25         |
| Sample 36            | 10/4/18                               | 10/11/18                               | 49.7                                           | 6.98                                                   | 0.25         |
| Sample 37            | 10/18/18                              | 10/25/18                               | 49.8                                           | 6.94                                                   | 0.13         |
| Sample 38            | 11/1/18                               | 11/6/18                                | 50.0                                           | 8.22                                                   | 0.25         |
| Sample 39            | 11/1/18                               | 11/6/18                                | 48.2                                           | 8.02                                                   | 0.25         |

Table S1. Summary of all successfully measured MLO  $^{14}\text{CO}$  samples. Samples with "N/A" indicated for second sampling date were collected in a single session. Sample carbon mass is as determined at ANSTO. Blank-corrected  $^{14}\text{CO}$  values are shown. Errors shown for  $^{14}\text{CO}$  are  $1 \sigma$ . Based on  $^{14}\text{CO}$  and  $[\text{CO}]$  values, we suspect that Samples 13 and 15 were accidentally switched during processing; these samples are therefore not included. Sample 34 was lost due to a procedural error.

| Blank Number | First sampling date, mo/day/yr | Second sampling date, mo/day/yr | Sample mass, $\mu\text{g C}$ | $^{14}\text{CO}$ , molecules / cc STP | Error |
|--------------|--------------------------------|---------------------------------|------------------------------|---------------------------------------|-------|
| Blank 1      | 11/14/17                       | 11/21/17                        | 18.4                         | 1.47                                  | 0.05  |
| Blank 2      | 12/12/17                       | 12/19/17                        | 18.3                         | 1.70                                  | 0.05  |
| Blank 3      | 1/11/18                        | 1/18/18                         | 20.0                         | 1.64                                  | 0.06  |
| Blank 4      | 2/22/18                        | 3/1/18                          | 20.2                         | 1.64                                  | 0.06  |
| Blank 5      | 3/22/18                        | 3/29/18                         | 18.5                         | 1.38                                  | 0.05  |
| Blank 6      | 4/5/18                         | 4/12/18                         | 18.8                         | 1.02                                  | 0.04  |
| Blank 7      | 5/3/18                         | 5/8/18                          | 18.9                         | 1.27                                  | 0.06  |
| Blank 8      | 5/31/18                        | 6/7/18                          | 18.0                         | 1.51                                  | 0.06  |
| Blank 9      | 6/19/18                        | N/A                             | 18.3                         | 1.15                                  | 0.05  |
| Blank 10     | 8/2/18                         | N/A                             | 49.4                         | 0.74                                  | 0.05  |
| Blank 11     | 8/21/18                        | 8/28/18                         | 50.0                         | 1.22                                  | 0.06  |
| Blank 13     | 10/18/18                       | 10/25/18                        | 49.2                         | 1.39                                  | 0.06  |

Table S2. Table S1. Summary of all successfully measured MLO  $^{14}\text{CO}$  blanks. Blanks with “N/A” indicated for second sampling date were collected in a single session. Sample carbon mass is as determined at ANSTO. Errors shown for  $^{14}\text{CO}$  are  $1 \sigma$ . Blank 12 was lost due to a procedural error.
